# Supplementary material for: The application of physics-informed neural networks to hydrodynamic voltammetry
Source: Royal Society of Chemistry journal article supplement (doi:10.1039/d2an00456a), 2022-01-01
Supplement: d2an00456a1.pdf [file d2an00456a1.pdf]

# Supplementary Information for “The Application of Physics-Informed Neural Networks to Hydrodynamic Voltammetry”

Haotian Chen<sup>a</sup>, Enno Kätelhön<sup>b</sup>, Richard G. Compton<sup>a\*</sup>

<sup>a</sup> Department of Chemistry, Oxford University, South Parks Road, Oxford OX1 3QZ, Great Britain

<sup>b</sup> MHP Management- und IT-Beratung GmbH, Königsallee 49, 71638 Ludwigsburg, Germany

\* Corresponding author.

Email address: Richard.compton@chem.ox.ac.uk (R. G. Compton)

## Table of Contents

|   |                                                               |   |
|---|---------------------------------------------------------------|---|
| 1 | PINN Simulation of a Double Channel Electrode .....           | 1 |
| 2 | PINN Simulation of a Channel Electrode with CE reaction ..... | 2 |

## 1 PINN Simulation of a Double Channel Electrode

The steady state transport limited currents flowing through both the generator and detector electrodes and thus the collection efficiency of double channel electrode.  $C_A(X,Y)$  is predicted at steady state using a PINN. The physical constraints are:

$$\frac{\partial^2 C_A}{\partial Y^2} + \frac{\partial^2 C_A}{\partial X^2} - V_x \frac{\partial C_A}{\partial X} = 0, \Omega_X \times \Omega_Y \quad 1.1$$

$$\frac{dC_A}{dY} = 0, X = [0, X_1], Y = 0 \quad 1.2$$

$$C_A = 0, X = [X_1, X_2] \quad 1.3$$

$$\frac{dC_A}{dY} = 0, X = [X_2, X_3], Y = 0 \quad 1.4$$

$$C_A = 1, X = [X_3, X_4] \quad 1.5$$

$$\frac{dC_A}{dY} = 0, X = [X_4, X_{channel}], Y = 0 \quad 1.6$$

$$C_A = 1, X = 0, \Omega_Y \quad 1.7$$

$$\frac{dC_A}{dY} = 0, \Omega_X, Y = Y_{channel} \quad 1.8$$

where  $\Omega_X \in [0, X_{channel}]$  and  $\Omega_Y \in [0, Y_{channel}]$ . To enforce

the constraints, the mean square error (MSE) loss functions are:

$$\frac{1}{N} \sum_{i=1}^N \left( \frac{\partial^2 C_A}{\partial Y^2} + \frac{\partial^2 C_A}{\partial X^2} - V_x \frac{\partial C_A}{\partial X} \right)^2, \Omega_X \times \Omega_Y \quad 2.1$$

$$\frac{1}{N} \sum_{i=1}^N \left( \frac{dC_A}{dY} \right)^2, X = [0, X_1], Y = 0 \quad 2.2$$

$$\frac{1}{N} \sum_{i=1}^N (C_A)^2, X = [X_1, X_2] \quad 2.3$$

$$\frac{1}{N} \sum_{i=1}^N \left( \frac{dC_A}{dY} \right)^2, X = [X_2, X_3], Y = 0 \quad 2.4$$

$$\frac{1}{N} \sum_{i=1}^N (C_A - 1)^2, X = [X_3, X_4] \quad 2.5$$

$$\frac{1}{N} \sum_{i=1}^N \left( \frac{dC_A}{dY} \right)^2, X = [X_4, X_{channel}], Y = 0 \quad 2.6$$

$$\frac{1}{N} \sum_{i=1}^N (C_A - 1)^2, X = 0, \Omega_Y \quad 2.7$$

$$\frac{1}{N} \sum_{i=1}^N \left( \frac{dC_A}{dY} \right)^2, \Omega_X, Y = Y_{channel} \quad 2.8$$

The global loss implemented in PINN is a linear combination of all the MSEs as:

$$L = \sum_{i=1}^8 w_i MSE_i \quad (3)$$

where  $w_i$  is the weight of each MSE.  $w$  is set to 1 to generate the results in this paper.

## 2 PINN Simulation of a Channel Electrode with CE reaction

The transport limited current of channel electrode is calculated for a CE reaction via a PINN which predicts the concentration of the two species,  $C_R(X,Y)$  and  $C_A(X,Y)$  in the simulation domain while satisfying the following two sets of constraints. For species  $R$ :

$$\frac{\partial^2 C_A}{\partial Y^2} + \frac{\partial^2 C_A}{\partial X^2} - V_x \frac{\partial C_A}{\partial X} + K_f C_R - K_b C_A = 0 \quad 4.1$$

$$\frac{\partial C_A}{\partial Y} = 0, X = [0, X_1], y = 0 \quad 4.1$$

$$C_A = 0, X = [X_1, X_2], y = 0 \quad 4.2$$

$$\frac{\partial C_A}{\partial Y} = 0, X = [X_2, X_{channel}] \quad 4.3$$

$$C_A = C_A^*, X = 0, Y = [0, Y_{channel}] \quad 4.4$$

$$\frac{\partial C_A}{\partial Y} = 0, X = [0, Y_{channel}], Y = Y_{channel} \quad 4.5$$

And for species  $A$ :

$$d_R \frac{\partial^2 C_R}{\partial Y^2} + d_R \frac{\partial^2 C_R}{\partial X^2} - V_x \frac{\partial C_R}{\partial X} - K_f C_R + K_b C_A = 0 \quad 5.1$$

$$\frac{\partial C_R}{\partial Y} = 0, X = [0, X_{channel}], Y = 0 \quad 5.2$$

$$C_R = C_R^*, X = 0, Y = [0, Y_{channel}] \quad 5.3$$

$$\frac{\partial C_R}{\partial Y} = 0, X = [0, X_{channel}], Y = Y_{channel} \quad 5.4$$

The MSE loss functions consider both eqn(4) and eqn(5) are:

$$\frac{1}{N} \sum_{i=1}^N \left( \frac{\partial^2 C_A}{\partial Y^2} + \frac{\partial^2 C_A}{\partial X^2} - V_x \frac{\partial C_A}{\partial X} + K_f C_R - K_b C_A \right)^2, \Omega_X \times \Omega_Y \quad 6.1$$

$$\frac{1}{N} \sum_{i=1}^N \left( \frac{\partial C_A}{\partial Y} \right)^2, X = [0, X_1], Y = 0 \quad 6.2$$

$$\frac{1}{N} \sum_{i=1}^N (C_A)^2, X = [X_1, X_2], Y = 0 \quad 6.3$$

$$\frac{1}{N} \sum_{i=1}^N \left( \frac{\partial C_A}{\partial Y} \right)^2, X = [X_2, X_{channel}] \quad 6.4$$

$$\frac{1}{N} \sum_{i=1}^N (C_A - C_A^*)^2, X = 0, Y = [0, Y_{channel}] \quad 6.5$$

$$\frac{\partial C_A}{\partial Y} = 0, X = [0, Y_{channel}], Y = Y_{channel} \quad 6.6$$

$$\frac{1}{N} \sum_{i=1}^N \left( d_R \frac{\partial^2 C_R}{\partial Y^2} + d_R \frac{\partial^2 C_R}{\partial X^2} - V_x \frac{\partial C_R}{\partial X} - K_f C_R + K_b C_A \right)^2, \Omega_X \times \Omega_Y \quad 6.7$$

$$\frac{1}{N} \sum_{i=1}^N \left( \frac{\partial C_R}{\partial Y} \right)^2, X = [0, X_{channel}], Y = 0 \quad 6.8$$

$$\frac{1}{N} \sum_{i=1}^N (C_R - C_R^*)^2, X = 0, Y = [0, Y_{channel}] \quad 6.9$$

$$\frac{1}{N} \sum_{i=1}^N \left( \frac{\partial C_R}{\partial Y} \right)^2, X = [0, X_{channel}], Y = Y_{channel} \quad 6.10$$

The global loss is thus a linear combination of eqn(6) as:

$$L = \sum_{i=1}^{10} w_i MSE_i \quad (7)$$

To predict mass transport of two species, two independent neural networks are first constructed, specializing in predicting  $C_R$  and  $C_A$  respectively. Then the two networks are connected via the physical constraints implemented according to eqn(6) and a schematic illustration is shown in Figure S 1. Implementation using TensorFlow can be found at <https://github.com/nmerovingian/PINN-Hydrodynamic-Voltammetry>.

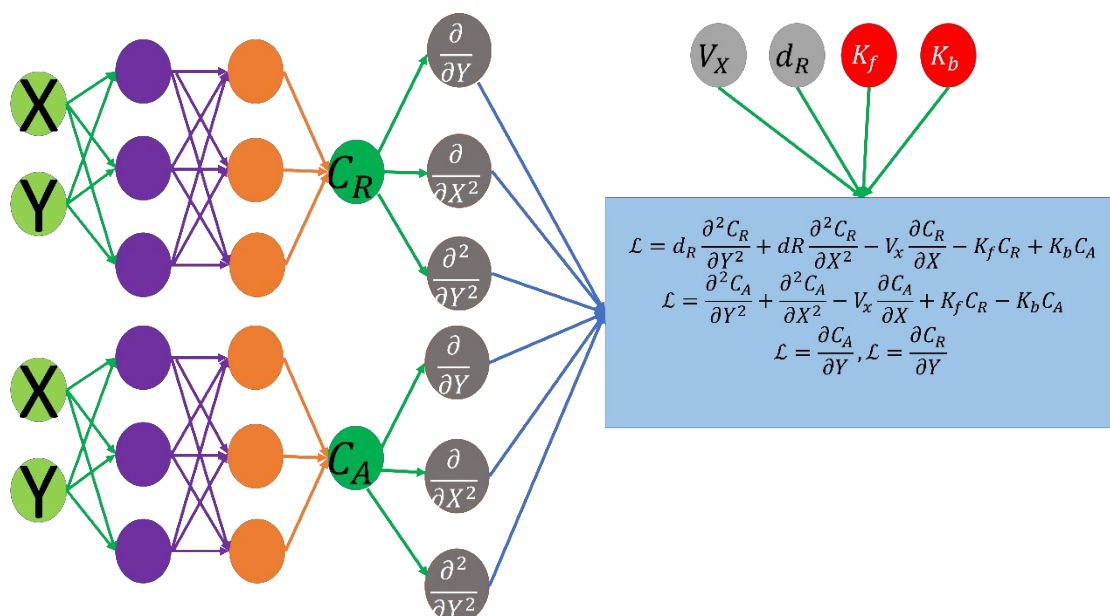

Figure S 1. Schematic illustration of the structure of the PINN when predicting channel electrode transport limited current for a CE reaction. It shows two fully-connected neural network, each specializing in predicting the concentration of one species, which are then connected together by the physical constraints.

### 3 Computational time

The simulations were run using a Nvidia V100 GPU and 12 allocated CPU cores using the Advanced Research Computing (ARC) facility at the University of Oxford. We also performed the simulations on a desktop without a GPU and equipped with E5-2640 v4 CPU\* 2 (20 CPU cores in total) and 16 GB of RAM. The computational time of the three models mentioned in the paper is compared in Table 1.

Table 1, Computational time at a cluster and a desktop

|                                                     | Cluster     | Desktop   |
|-----------------------------------------------------|-------------|-----------|
| Single microband channel electrode                  | 1-2 hours   | 4-6 hours |
| Double microband channel electrode                  | 0.5-1 hours | 2-3 hours |
| Single microband channel electrode with CE reaction | ~ 3 hours   | ~ 7 hours |
